# Supplementary material for: Mutation Associated with Orange Fruit Color Increases Concentrations of β-Carotene in a Sweet Pepper Variety (Capsicum annuum L.)
Source: MDPI journal article supplement (doi:10.3390/foods10061225), 2021-05-28
Supplement: s1 [file s1]

# Mutation Associated with Orange Fruit Colour Increases Concentrations of $\beta$ -carotene in a Sweet Pepper Variety (*Capsicum annuum* L.)

## Sub-title: Biochemical and Molecular Characterization of Bulgarian Mutant Pepper Variety with a High-Added Value

Nasya Tomlekova <sup>1\*</sup>, Velichka Spasova-Apostolova <sup>2</sup>, Ivelin Panchev <sup>3</sup>, and Fatma Sarsu <sup>4</sup>

<sup>1</sup> Department of Breeding, Variety Maintenance and Introduction, Maritsa Vegetable Crops Research Institute, 32 Brezovsko shosse St., 4003 Plovdiv, Bulgaria; nasia.tomlekova@gmail.com

<sup>2</sup> Department of Breeding and Seed Production, Tobacco and Tobacco Products Institute, 4108 Markovo, Bulgaria; vilispasova-apostolova@abv.bg

<sup>3</sup> Department of Biochemistry, Sofia University, 8 Dragan Tzankov, 1164 Sofia, Bulgaria; ipantchev@gmail.com

<sup>4</sup> Plant Breeding and Genetics Section, Joint FAO/IAEA Division of Nuclear Techniques in Food and Agriculture, International Atomic Energy Agency, 1400 Vienna, Austria; F.Sarsu@iaea.org

\* Nasya Tomlekova: nasia.tomlekova@gmail.com ; Tel.: +359 (0)32 951227

### Primers and primer sequences used in the present study

**Table S1.** Primers names and sequences positioned in the sequences of  $\beta$ -carotene hydroxylase genes in pepper

| Primers    | Sequences                         | Authors     | T <sub>m</sub> , °C |
|------------|-----------------------------------|-------------|---------------------|
| b-CRT 1 F  | CTTCACCGTACCGTACATG               | unpublished | 52                  |
| b-CRT 3 F  | CTTATCATGTGTTGTCTCTCG             | unpublished | 51                  |
| b-CrtZ 4 R | CCTTCTCTTGGTCTATGGTG              | unpublished | 51                  |
| b-CRT 5 F  | TTGCAGTCACACCATAGA                | unpublished | 50                  |
| b-CRT 6 R  | GAAGATCACATTTGTCAG                | unpublished | 45                  |
| b-CRT 7 F  | TTAATCACACTTGGCACCAT              | unpublished | 52                  |
| b-CRT 8 R  | AGAGCCTAAATACAAGTCCA              | unpublished | 50                  |
| FW1_H2     | ATGGCTGCTGAAATTTCAATCTCCGCTAGCTCC | unpublished | 65                  |
| FW1_H1     | GTCCACCTCCCGTACAAGTTATTACCGCC     | unpublished | 64                  |
| RE1_H1     | GGGAATGAGGCCTTTATGGAAGAAACCATAGTC | unpublished | 62                  |
| RE2_H1     | AAGCCATAAGGGACACCGTTGAACCTTCTCT   | unpublished | 63                  |
| CrtZ-B_F   | CGTACCGTACATGGCTGCT               | [44]        | 57                  |
| CrtZ-B_R   | CATCTCGCCCAGTACTCCAT              | [44]        | 55                  |
| CrtZ-C_F   | GAGCTGAACGATATTTTGCC              | [43]        | 52                  |
| CrtZ-C_R   | TAGGAACAAGCCATATGGGA              | [43]        | 52                  |
| CrtZ-D_F   | AGATGGGCGCATAGAGCACTA             | [43]        | 57                  |

|            |                      |      |    |
|------------|----------------------|------|----|
| CrtZ-D_R   | ACCCCATCAAATTTGTCCGA | [43] | 54 |
| CrtZ-E_F   | CGTACATGGCTGCTGAAATT | [43] | 53 |
| BCH F      | ATGGCTGTTATGGCGGTTTA | [35] | 54 |
| BCH R      | ATCGTTCAGCTCGAAAGGTC | [35] | 55 |
| CrtZ_R EX1 | ACCTCCATTTGCCACG     | [35] | 51 |

\* Primers designed by Tomlekova et al. (2009) [43], Petrov et al. (2013) [44] and Tomlekova et al. (2016) [35]
