# Supplementary material for: Mutation Associated with Orange Fruit Color Increases Concentrations of β-Carotene in a Sweet Pepper Variety (Capsicum annuum L.)
Source: MDPI journal article supplement (doi:10.3390/foods10061225), 2021-05-28
Supplement: s1 [file s1]

# Mutation Associated with Orange Fruit Colour Increases Concentrations of $\beta$ -carotene in a Sweet Pepper Variety (*Capsicum annuum* L.)

## Sub-title: Biochemical and Molecular Characterization of Bulgarian Mutant Pepper Variety with a High-Added Value

Nasya Tomlekova <sup>1\*</sup>, Velichka Spasova-Apostolova <sup>2</sup>, Ivelin Panchev <sup>3</sup>, and Fatma Sarsu <sup>4</sup>

<sup>1</sup> Department of Breeding, Variety Maintenance and Introduction, Maritsa Vegetable Crops Research Institute, 32 Brezovsko shosse St., 4003 Plovdiv, Bulgaria; nasia.tomlekova@gmail.com

<sup>2</sup> Department of Breeding and Seed Production, Tobacco and Tobacco Products Institute, 4108 Markovo, Bulgaria; vilispasova-apostolova@abv.bg

<sup>3</sup> Department of Biochemistry, Sofia University, 8 Dragan Tzankov, 1164 Sofia, Bulgaria; ipantchev@gmail.com

<sup>4</sup> Plant Breeding and Genetics Section, Joint FAO/IAEA Division of Nuclear Techniques in Food and Agriculture, International Atomic Energy Agency, 1400 Vienna, Austria; F.Sarsu@iaea.org

\* Nasya Tomlekova: nasia.tomlekova@gmail.com ; Tel.: +359 (0)32 951227

**Combined sequence of the *CrtZ<sub>chr06</sub>* gene (beta-carotene hydroxylase gene located on chromosome 6) in pepper - Oranzheva kapia, Pazardzhishka kapia 794 and Kurtovska kapia 1 (combined sequence of multiple sequenced clones in the 3 genotypes studied).**

```
GTCCACCTCCCGTACAAGTTATTACCGCCATAGCCCATTTCTCGGCCAAAACCCACTCC
AACAAACCCCATCAGTGTACCCATAACTCCGTTTCTCCTAATCTCGGCTCAATTCTGAG
GTGTAGAAGGAGACCCAGCTTCACTGTTTGCTTTGTTCTTGAGGATGACAAGTTCAAAC
CCAATTTGAGGCTGGGGAAGAAGATATTGAAATGAAGATTGAAGAGCAGATCTCAGCGAC
GCGTTTGGCGGAGAAATTGGCTAGGAAGAAATCGGAGAGGTTTACTTATCTTGTTGCTGC
GGTTATGTCTAGTTTTGGGATTACTTCCATGGCTGTTATGGCGGTTTATTACAGATTTTA
CTGGCAAATGGAGGTACTGGAACATTCCATAATCCCCAACTCTTCTTTTGGGACTT
AAATTTTATTGTAATTTTATTCTGTTTCGAGTGTAGGGTGGAGAAGTTCCTTTTCCGA
AATGTTTGGCACATTTGCTCTCTCTGTTGGTGCTGCTGTAAGTICCATTTCTGTCTTATT
ATGAGCTAGTAATTGTAAGATTAGATACTGGCCTAATTCATACCCCCAAAAGAGCTAGCC
GATGAGGAGAATATTGTTCAAGTCCGACCCATATCATTAAACCATCAATATGGACTTTTTC
ATTAATAAATTAGTCGGCAAAAATATTGTAACGGTTGAAAAGTATTATTCCGTAATTACT
GGAGAAACATTAATAAGTCGAAATTCAAATTACAAGTGGTTTAAAAGTTTGAAATTTTCA
AAAATATTTTGAATCATTCTAGAATAGTTAACAAGAGAGTAAGTAAATAGCAGAGTT
GGTCTTCGGTGATCGATTTTAAATGTCTGATGAAAATTGAATTGGAATTCAGGTAGG
AATGGAGTTTGGGCTAGGTGGGCACATAAAGCGCTATGGCACGCCTCTTTATGGCACAT
GCACGAGGTTTGTGTGCTACTTATATGGATAGTAATTAAATGCCTTATTTATTCTTGAT
GAGAAAAGAATTACTTAAGATAATTTAGTACGTACTTTATATTAAGATTACTGTGCTTAC
ATTAAATTGTTGCAGTCACACCACAAACCAAGAGAAGGACCTTTCGAGCTGAACGATGTT
```

TTTGCCATAATCAATGCTGTTCCAGCTATAGCCCTCCTTGACTATGGTTTCTTCCATAAA  
GGCCTCATTCCCGGCCTCTGCTTCGGCGCTGTATGTCATCATTGGCTTGCACTTTTTT  
TAAAAAATAATGTAAAGTATGATCTTGATGGGGCACAAATTCAAATTTAAAATAAGAT  
AATCCATAATGGACGTAATCTATATTTATAAACTTCAAAATTCCTTTTTTCATATAATGTA  
AATGAATTGAAAGCAGTTAGATAGCTAAACATGTTGATCTTGCTCTAAGTCCCCCTCTAA  
TATTTCCCTAGGATACTCCAGAAATTTACTCGATTAAAGACGCTGTCTATTGCTTAGTGT  
AAATTAATGAGTATAGTTGTAAATATTTTATTTACATCAAGTCTAAACTCGTTTTAAGTT  
CAACGTAAATTGATGAAGCGGTCTTCTGTTATGCAGGGGTTAGGGATCACAGTATTTGG  
GATGGCATAACATGTTTCGTTTCATGATGGTTTGGTTCACAAGAGATTCCCTGTTGGACCTGT  
AGCTAATGTACCTTATCTTAGGAAGGTGGCTGCAGCTCATTTCGGTAATTTAATCACACTT  
GAATGCGATTTTTATGAAGTACTATTAATTGAAATTTGTTCATAAGATTTTCTAATGTAT  
TGGTTTGCTACTGCATTTGCAGCTTCATCATTGAGAGAAGTTCAACGGTGTCCCTTATGG  
CTT
